# Supplementary material for: An efficient Ni3S2–Ni electrode constructed by a one-step powder metallurgy approach for the hydrogen evolution reaction
Source: Royal Society of Chemistry journal article supplement (doi:10.1039/d3se01393f), 2023-12-07
Supplement: d3se01393f1.pdf [file d3se01393f1.pdf]

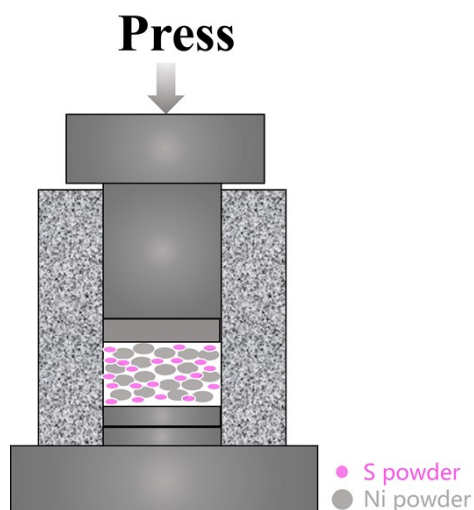

Figure S1. The schematic diagram of pressing process.

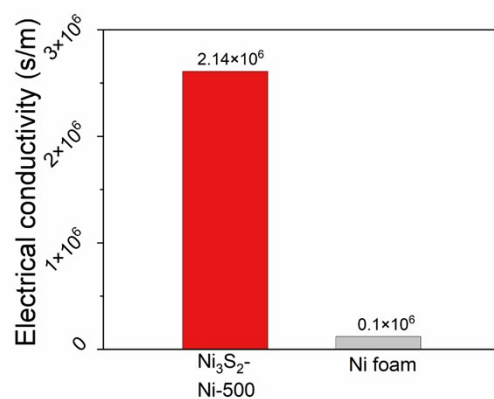

Figure S2. The comparison of the electrical conductivity of different electrodes.

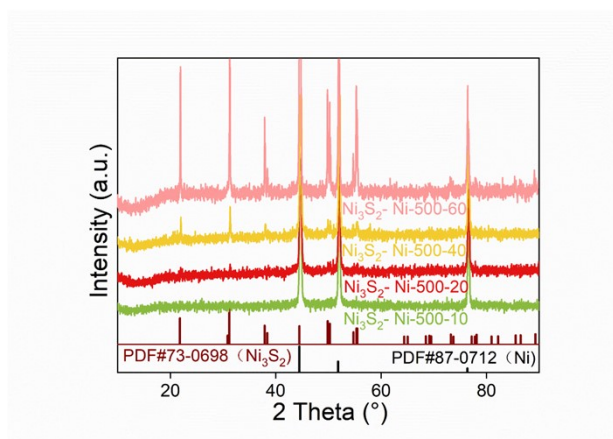

Figure S3. XRD patterns of Ni<sub>3</sub>S<sub>2</sub>-Ni-500-Y electrodes.

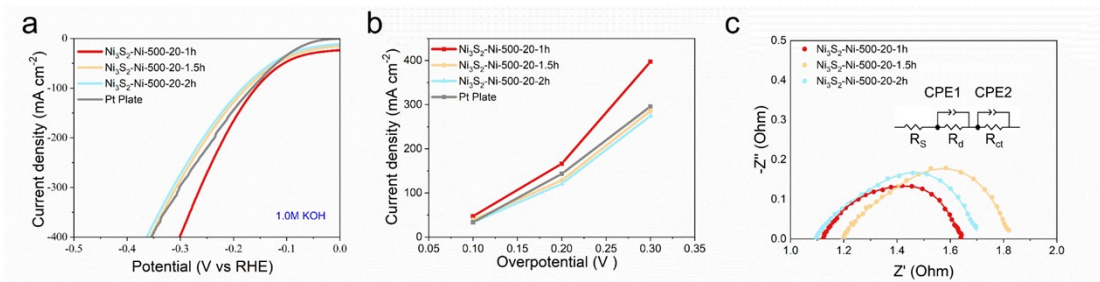

**Figure S4.** (a) HER polarization curves of Ni<sub>3</sub>S<sub>2</sub>-Ni-500-20-1 h, Ni<sub>3</sub>S<sub>2</sub>-Ni-500-20-1.5 h, Ni<sub>3</sub>S<sub>2</sub>-Ni-500-20-2 h, and Pt plate electrodes. (b) Comparison of the current density of Ni<sub>3</sub>S<sub>2</sub>-Ni-500-20-1h, Ni<sub>3</sub>S<sub>2</sub>-Ni-500-20-1.5 h, Ni<sub>3</sub>S<sub>2</sub>-Ni-500-20-2h, and Pt plate electrodes under the same overpotential. (c) EIS of Ni<sub>3</sub>S<sub>2</sub>-Ni-500-20-1 h, Ni<sub>3</sub>S<sub>2</sub>-Ni-500-20-1.5 h and Ni<sub>3</sub>S<sub>2</sub>-Ni-500-20-2 h electrodes.
