# Supplementary material for: An efficient Ni3S2–Ni electrode constructed by a one-step powder metallurgy approach for the hydrogen evolution reaction
Source: Royal Society of Chemistry journal article supplement (doi:10.1039/d3se01393f), 2023-12-07
Supplement: d3se01393f2.pdf [file d3se01393f2.pdf]

## Supporting Information

### **An efficient Ni<sub>3</sub>S<sub>2</sub>-Ni electrode constructed by one-step powder metallurgy approach for hydrogen evolution reaction**

*Yang Zhao<sup>†a</sup>, Xiaoqian Shi<sup>†a</sup>, Bin Zhang<sup>a</sup>, Shizhong Wei<sup>\*a</sup>, Jiping Ma<sup>a</sup>, Jianbin Lai<sup>a</sup>, Guangmin Zhou<sup>b</sup> and Huan Pang<sup>\*c</sup>*

<sup>a</sup> School of Materials Science and Engineering, Henan University of Science and Technology, Luoyang 471003, China.

<sup>b</sup> Shenzhen Geim Graphene Center, Tsinghua-Berkeley Shenzhen Institute, Tsinghua Shenzhen International Graduate School, Tsinghua University, Shenzhen 518055, China.

<sup>c</sup> School of Chemistry and Chemical Engineering, Yangzhou University, Yangzhou, 225002, PR China

Author 1 (Yang Zhao) and Author 2 (Xiaoqian Shi) contributed equally to this work.

Corresponding author E-mail:

Shizhong Wei: [wsz@haust.edu.cn](mailto:wsz@haust.edu.cn);

Huan Pang: [panghuan@yzu.edu.cn](mailto:panghuan@yzu.edu.cn)

Homepage: <http://huanpangchem.wix.com/advanced-material>

## Supplementary Pictures and Table

### Experimental section

1. Materials and Synthesis of  $\text{Ni}_3\text{S}_2\text{-Ni-X-Y}$  electrode. Commercial Ni powder and nano S powder are used directly without further treatment. First, 2 g Ni powder and 20 mg nano S powder were mixed together. Second, the mixed Ni and S were pressed to form a cylinder with a diameter of 20 mm. As illustrated in **Figure S1**, the mixed Ni powder and S powder were firstly loaded into a home-made stainless steel mold. The mold was then placed on the working table of the hydraulic press, and the powder was pressed by applying pressure to the mold. Finally, a small round piece was obtained after disassembly of the mold. Finally, a  $\text{Ni}_3\text{S}_2\text{-Ni-500-20}$  electrode (500 represent the sintering temperature, 20 represent the S content) was obtained after the one-step powder metallurgy of cylinder at 500 °C for 1 h under vacuum. Other electrodes sintered at other temperatures of 400, 600 and 700 °C were labeled as  $\text{Ni}_3\text{S}_2\text{-Ni-400-20}$ ,  $\text{Ni}_3\text{S}_2\text{-Ni-600-20}$  and  $\text{Ni}_3\text{S}_2\text{-Ni-700-20}$ . When the Ni was fixed at 2 g, the  $\text{Ni}_3\text{S}_2\text{-Ni-500-Y}$  electrodes with other different S content were labeled as  $\text{Ni}_3\text{S}_2\text{-Ni-500-10}$ ,  $\text{Ni}_3\text{S}_2\text{-Ni-500-40}$  and  $\text{Ni}_3\text{S}_2\text{-Ni-500-60}$ , where S content was 10, 40 and 60 mg, respectively.

2. Characterization. The phase and the surface chemical states of the electrodes were determined by X-ray diffraction (XRD), Raman spectroscopy and X-ray photoelectron spectroscopy (XPS). The morphology of the electrodes was observed by scanning electron microscopy (SEM) and transmission electron microscopy (TEM).

3. Electrochemical characterization. The electrochemical performances were tested in 1.0 M KOH electrolyte with a standard three-electrode system using the Biologic VSP electrochemical workstation. The prepared self-supporting electrode was used directly as working electrode, graphite-rod was used as counter electrode and Hg/HgO electrode was used as reference electrode. The HER catalytic activity of  $\text{Ni}_3\text{S}_2\text{-Ni}$  was obtained by linear sweep voltammetry (LSV) with a scan rate of 5  $\text{mV s}^{-1}$ . All measured potentials were calibrated to RHE using the following equation:

$$E_{\text{vs RHE}} = E_{\text{vs Hg/HgO}} + E_{\text{Hg/HgO}}^{\theta} + 0.059 \times \text{pH}, (E_{\text{Hg/HgO}}^{\theta} = 0.098 \text{ V}, \text{pH} = 14).$$

Nyquist plots were measured at the frequency range of 1.0 MHz to 10 mHz. Chronoamperometry (CA) measurements were applied under different current densities of 100, 200, 300 and 400 mA cm<sup>-2</sup> for 24 h to verify the stability of the Ni<sub>3</sub>S<sub>2</sub>-Ni-500 -20 electrode. Long-term stability with three-electrodes system was tested under a current density of 260 mA cm<sup>-2</sup>.

**Table S1.** A list of preparation conditions of Ni<sub>3</sub>S<sub>2</sub>-Ni-X-Y electrodes

| Electrode                                      | Ni (mg) | S (mg) | Temperature (°C) | Time (h) |
|------------------------------------------------|---------|--------|------------------|----------|
| Ni <sub>3</sub> S <sub>2</sub> -Ni-500-10      | 2000    | 10     | 500              | 1        |
| Ni <sub>3</sub> S <sub>2</sub> -Ni-500-20      | 2000    | 20     | 500              | 1        |
| Ni <sub>3</sub> S <sub>2</sub> -Ni-500-40      | 2000    | 40     | 500              | 1        |
| Ni <sub>3</sub> S <sub>2</sub> -Ni-500-60      | 2000    | 60     | 500              | 1        |
| Ni <sub>3</sub> S <sub>2</sub> -Ni-400-20      | 2000    | 20     | 400              | 1        |
| Ni <sub>3</sub> S <sub>2</sub> -Ni-600-20      | 2000    | 20     | 600              | 1        |
| Ni <sub>3</sub> S <sub>2</sub> -Ni-700-20      | 2000    | 20     | 700              | 1        |
| Ni <sub>3</sub> S <sub>2</sub> -Ni-500-20-1.5h | 2000    | 20     | 500              | 1.5      |
| Ni <sub>3</sub> S <sub>2</sub> -Ni-500-20-2h   | 2000    | 20     | 500              | 2        |

**Table S2.** Comparison of electrochemical performance of different catalysts

|                                              | Current density (mA cm <sup>-2</sup> ) | Overpotential (mV) | Electrolyte     | Ref.      |
|----------------------------------------------|----------------------------------------|--------------------|-----------------|-----------|
| RCFP/NF                                      | 100                                    | 191                | 1M KOH          | 42        |
| Fe-doped Ni <sub>3</sub> S <sub>2</sub>      | 100                                    | 254                | 1M KOH          | 36        |
| Co-NiOOH/Ni <sub>3</sub> S <sub>2</sub> @NF  | 100                                    | 203                | alkaline medium | 43        |
| F, P-Fe <sub>3</sub> O <sub>4</sub> /IF      | 100                                    | 179.5              | 1M KOH          | 44        |
| Mo-NiS/Ni <sub>3</sub> S <sub>2</sub> -0.08S | 100                                    | 230                | 1M KOH          | 32        |
| Ni <sub>3</sub> S <sub>2</sub> -Ni           | 100                                    | 157.8              | 1M KOH          | This work |

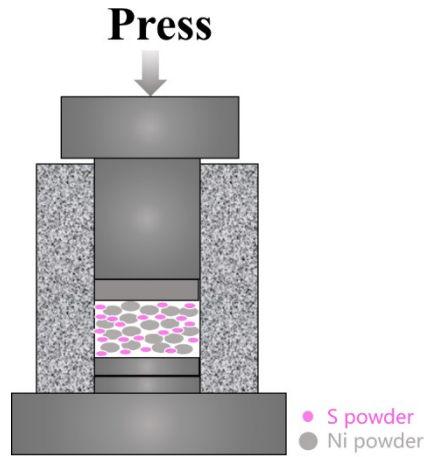

**Figure S1.** The schematic diagram of pressing process.

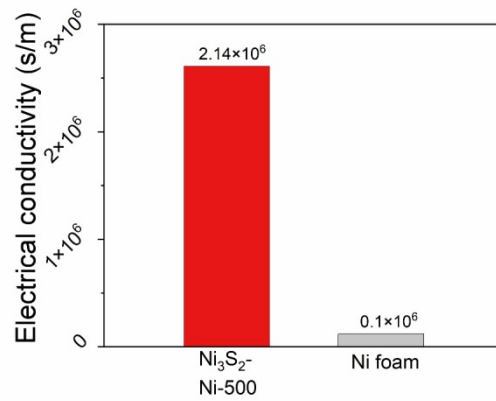

**Figure S2.** The comparison of the electrical conductivity of different electrodes

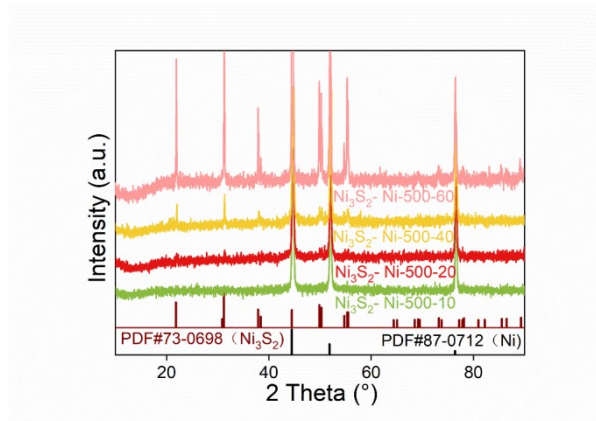

**Figure S3.** XRD patterns of Ni<sub>3</sub>S<sub>2</sub>-Ni-500-Y electrodes.

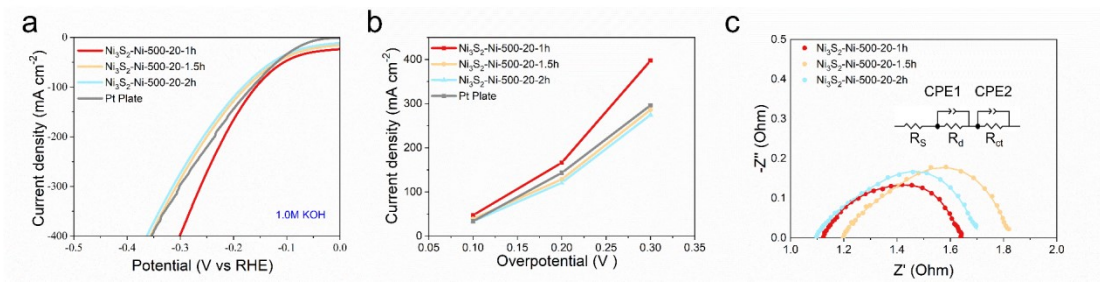

**Figure S4.** (a) HER polarization curves of Ni<sub>3</sub>S<sub>2</sub>-Ni-500-20-1h, Ni<sub>3</sub>S<sub>2</sub>-Ni-500-20-1.5h, Ni<sub>3</sub>S<sub>2</sub>-Ni-500-20-2h, and Pt plate electrodes. (b) Comparison of the current density of Ni<sub>3</sub>S<sub>2</sub>-Ni-500-20-1h, Ni<sub>3</sub>S<sub>2</sub>-Ni-500-20-1.5h, Ni<sub>3</sub>S<sub>2</sub>-Ni-500-20-2h, and Pt plate electrodes under the same overpotential. (c) EIS of Ni<sub>3</sub>S<sub>2</sub>-Ni-500-20-1h, Ni<sub>3</sub>S<sub>2</sub>-Ni-500-20-1.5h and Ni<sub>3</sub>S<sub>2</sub>-Ni-500-20-2h electrodes.
